# Supplementary material
Source: publisher figshare collection journal article supplement (https://tandf.figshare.com/articles/dataset/_/9804491)
Supplement: Supplementary file 1 [file 1]

Supplemental Table S2: The table shows the number of times that each variable was considered within the total number of candidate models ( $N^\circ \Delta AICc < 2$ ) used for model averaging.

| Environmental predictor   | Station A | Station B | Station C | Station D |
|---------------------------|-----------|-----------|-----------|-----------|
| Maximum temperature       |           | 2         |           | 2         |
| Minimum temperature       | 2         | 2         | 1         |           |
| Rainfall                  | 1         |           | 1         | 2         |
| Accumulated rainfall      | 2         | 1         |           | 2         |
| Humidity                  |           |           |           | 2         |
| Moon                      | 2         | 3         |           | 1         |
| $N^\circ \Delta AICc < 2$ | 2         | 3         | 1         | 2         |
