# Supplementary material
Source: publisher figshare collection journal article supplement (https://tandf.figshare.com/articles/dataset/_/9804491)
Supplement: Supplementary file 2 [file 1]

Archive with 2 entries (2 files):
- tbio_a_1658642_sm3611.pdf
- tbio_a_1658642_sm3604.pdf
