# Supplementary material
Source: publisher figshare collection journal article supplement (https://tandf.figshare.com/articles/dataset/_/9804491)
Supplement: Supplementary file 2 [file 1 › tbio_a_1658642_sm3604.pdf]

Supplemental Table S1: Summary of *Elachistocleis matogrosso* calling activity in four sites monitored with acoustic monitoring in Pantanal Matogrossense, Brazil. Sites were monitored from 8 June 2015 to 2 June 2016.

|           | First Song  | Last Song | Number of<br>days detected | Consecutive days<br>detected |
|-----------|-------------|-----------|----------------------------|------------------------------|
| Station A | 19 January  | 5 May     | 28                         | 9                            |
| Station B | 23 January  | 2 May     | 19                         | 10                           |
| Station C | 11 December | 8 April   | 19                         | 4                            |
| Station D | 6 December  | 23 April  | 47                         | 12                           |
